# Supplementary material for: Assessment of the Association between Entropy in PET/CT and Response to Anti-PD-1/PD-L1 Monotherapy in Stage III or IV NSCLC
Source: MDPI journal article supplement (doi:10.3390/life13041051), 2023-04-20
Supplement: s1 [file s1]

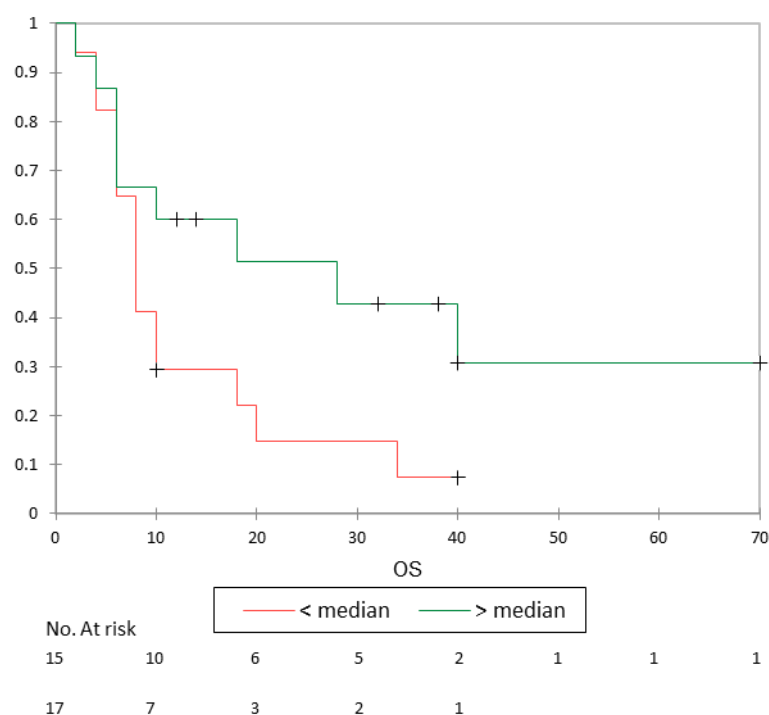

**Figure S1.** Association between GLCM-entropy and OS for patients treated in second line or more. Kaplan–Meier plot showing prognostic value of GLCM-entropy on the overall survival (OS) ( $p = 0.068$ ). Crosses represent censored patients.
